# Supplementary material for: Unravelling the chloride dopant induced film improvement in all-inorganic perovskite absorbers
Source: Royal Society of Chemistry journal article supplement (doi:10.1039/d4ta01259c), 2024-01-01
Supplement: d4ta01259c1.pdf [file d4ta01259c1.pdf]

## Supplementary Information

# Unravelling the chloride dopant induced film improvement in all-inorganic perovskite absorber

Stefan Nicholson,<sup>a,b</sup> Jochen Bruckbauer,<sup>b</sup> Paul R. Edwards,<sup>b</sup> Carol Trager-Cowan,<sup>b</sup> Robert W. Martin,<sup>b</sup> Aruna Ivaturi<sup>a\*</sup>

<sup>a</sup>Smart Materials Research and Device Technology (SMaRDT) Group, Department of Pure and Applied Chemistry, University of Strathclyde, Glasgow G1 1XL, United Kingdom

Semiconductor Spectroscopy and Devices Group, Department of Physics, SUPA, University of Strathclyde, Glasgow G4 0NG, United Kingdom

\*Corresponding author: aruna.ivaturi@strath.ac.uk

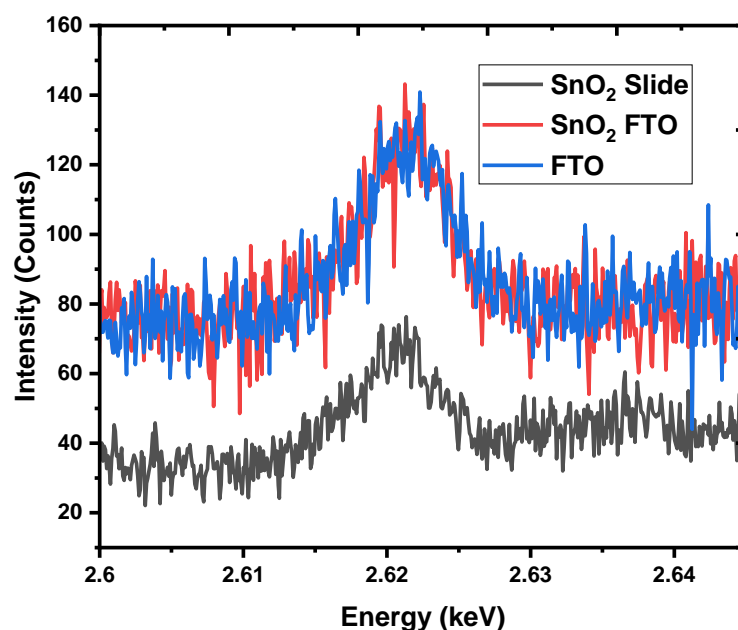

Figure S1. Cl K $\alpha$  WDX of Pilkington<sup>TM</sup> TEC15 FTO coated glass, and SnO<sub>2</sub> deposited on FTO. Also SnO<sub>2</sub> deposited directly onto a microscope slide was analysed.

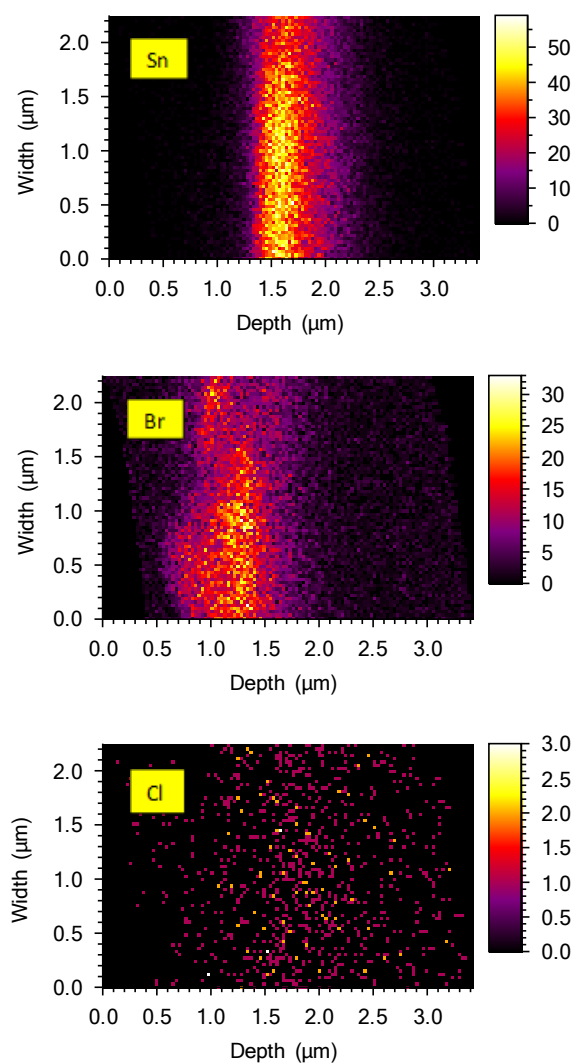

Figure S2 – Corrected cross section WDX ( $\text{Sn } L_{\alpha}$ ,  $\text{Br } L_{\alpha}$  and  $\text{Cl } K_{\alpha}$ ) plots of signal over distance for the undoped  $\text{CsPbI}_2\text{Br}$  film on  $\text{SnO}_2$  coated FTO. Br representing the perovskite layer, Sn for the  $\text{SnO}_2$  and FTO layers, and probing chlorine across these layers.

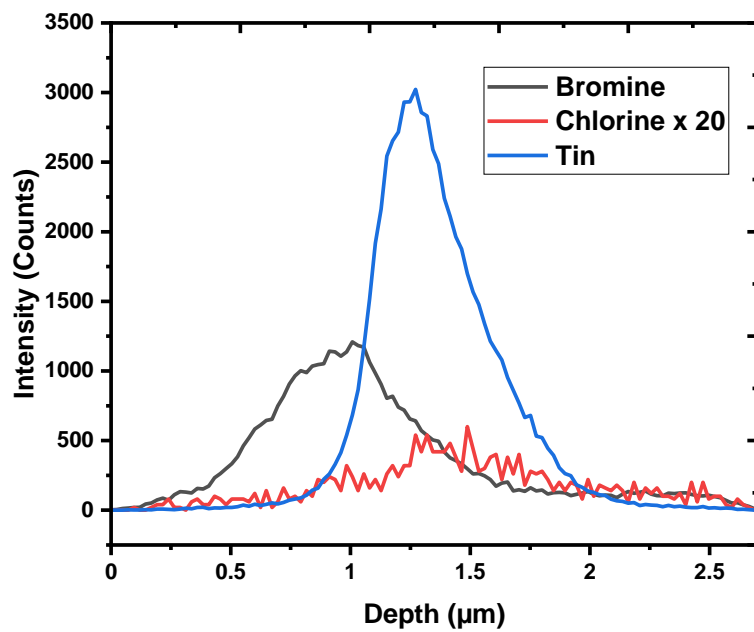

Figure S3 – Linescan of signal for each element across the depth of the cross-section WDX, with chlorine signal multiplied by 20.
